# Supplementary material
Source: PubMed Central journal article supplement (PMC3026652)
Supplement: Supp_Table.pdf [file Supp_Table.pdf]

SUPPLEMENTAL TABLE 1. ARTICLES CITED 1000+ TIMES

| Reference                                                          | No. of citations as of April 2010 |
|--------------------------------------------------------------------|-----------------------------------|
| Fridovich I. <i>Ann Rev Biochem</i> 64: 97–112, 1995               | 1230                              |
| Fridovich I. <i>Science</i> 201: 875–880, 1978                     | 2426                              |
| Fridovich I. <i>Ann Rev Biochem</i> 44: 147–159, 1975              | 1504                              |
| Misra HP and Fridovich I. <i>J Biol Chem</i> 247: 3170–3175, 1972  | 2200                              |
| Beauchamp C and Fridovich I. <i>Anal Biochem</i> 44: 276–287, 1971 | 3961                              |
| McCord JM and Fridovich I. <i>J Biol Chem</i> 244: 6049–6055, 1969 | 7975                              |

SUPPLEMENTAL TABLE 2. ARTICLES CITED 100+ TIMES

| Reference                                                                            | No. of citations as of April 2010 |
|--------------------------------------------------------------------------------------|-----------------------------------|
| Okado-Matsumoto A and Fridovich I. <i>Proc Natl Acad Sci USA</i> 99: 9010–9014, 2002 | 142                               |
| Okado-Matsumoto A and Fridovich I. <i>J Biol Chem</i> 276: 38388–38393, 2001         | 271                               |
| Tarpey MM and Fridovich I. <i>Circulation Res</i> 89: 224–236, 2001                  | 251                               |
| Fridovich I. <i>Ann N Y Acad Sci</i> 893: 13–18, 1999                                | 131                               |
| Batinic-Haberle I, et al. <i>Inorg Chem</i> 38: 4011–4022, 1999                      | 112                               |
| Benov L, et al. <i>Free Rad Biol Med</i> 25: 826–831, 1998                           | 224                               |
| Batinic-Haberle I, et al. <i>J Biol Chem</i> 273: 24521–24528, 1998                  | 127                               |
| Fridovich I. <i>J Exper Biol</i> 201: 1203–1209, 1998                                | 226                               |
| Fridovich I. <i>J Biol Chem</i> 272: 18515–18517, 1997                               | 454                               |
| Liochev SI and Fridovich I. <i>Arch Biochem Biophys</i> 337: 115–120, 1997           | 147                               |
| Hausladen A and Fridovich I. <i>J Biol Chem</i> 269: 29405–29408, 1994               | 370                               |
| Benov LT and Fridovich I. <i>J Biol Chem</i> 269: 25310–25314                        | 108                               |
| Faulkner KM, et al. <i>J Biol Chem</i> 269: 23471–23476, 1994                        | 269                               |
| Darr D and Fridovich I. <i>J Invest Dermatology</i> 102: 671–675, 1994               | 206                               |
| Liochev SI, et al. <i>Proc Natl Acad Sci USA</i> 91: 1328–1331, 1994                 | 106                               |
| Liochev SI and Fridovich I. <i>Free Rad Biol Med</i> 16: 29–33, 1994                 | 243                               |
| Faulkner K and Fridovich I. <i>Free Rad Biol Med</i> 15: 447–451, 1993               | 223                               |
| Liochev SI and Fridovich I. <i>Proc Natl Acad Sci USA</i> 89: 5892–5896, 1992        | 155                               |
| Gardner PR and Fridovich I. <i>J Biol Chem</i> 267: 8757–8763, 1992                  | 213                               |
| Beyer W, et al. <i>Prog Nucl Acid Res Mol Biol</i> 40: 221–253, 1991                 | 217                               |
| Gardner PR and Fridovich I. <i>J Biol Chem</i> 266: 19328–19333, 1991                | 275                               |
| Imlay JA and Fridovich I. <i>J Biol Chem</i> 266: 6957–6965, 1991                    | 225                               |
| Gardner PR and Fridovich I. <i>J Biol Chem</i> 266: 1478–1483, 1991                  | 157                               |
| Fridovich I. <i>J Biol Chem</i> 264: 7761–7764, 1989                                 | 518                               |
| Privalle CT and Fridovich I. <i>Proc Natl Acad Sci USA</i> 84: 2723–2726, 1987       | 145                               |
| Kuo CF, et al. <i>J Biol Chem</i> 262: 4724–4727, 1987                               | 158                               |
| Beyer WF and Fridovich I. <i>Anal Biochem</i> 161: 559–566, 1987                     | 406                               |
| Fridovich I. <i>Adv Enzymol Relat Areas Mol Biol</i> 58: 61–97, 1986                 | 579                               |
| Fridovich I and Freeman B. <i>Ann Rev Physiol</i> 48: 693–702, 1986                  | 169                               |
| Fridovich I. <i>Arch Biochem Biophys</i> 247: 1–11, 1986                             | 812                               |
| Blum J and Fridovich I. <i>Arch Biochem Biophys</i> 240: 500–508, 1985               | 312                               |
| Beyer WF and Fridovich I. <i>Biochemistry</i> 24: 6460–6467, 1985                    | 159                               |
| Clare DA, et al. <i>Anal Biochem</i> 140: 532–537, 1984                              | 210                               |
| DiGuseppi J and Fridovich I. <i>CRC Crit Rev Toxicol</i> 12: 315–342, 1984           | 137                               |
| Fridovich I. <i>Ann Rev Pharmacol Toxicol</i> 23: 239–257, 1983                      | 801                               |
| Kono Y and Fridovich I. <i>J Biol Chem</i> 258: 3646–3648, 1983                      | 105                               |
| Kono Y and Fridovich I. <i>J Biol Chem</i> 258: 6015–6019, 1983                      | 300                               |
| Rabinowitch HD and Fridovich I. <i>Photochem Photobiol</i> 37: 679–690, 1983         | 201                               |
| Archibald F and Fridovich I. <i>Arch Biochem Biophys</i> 214: 452–463, 1982          | 260                               |
| A Cudd and I Fridovich. <i>J Biol Chem</i> 257: 1443–1447, 1982                      | 174                               |
| Kono Y and Fridovich I. <i>J Biol Chem</i> 257: 5751–5754, 1982                      | 578                               |
| Brawn K and Fridovich I. <i>Arch Biochem Biophys</i> 206: 414–419, 1981              | 351                               |

(continued)

SUPPLEMENTAL TABLE 2. CONTINUED

| Reference                                                                  | No. of citations as of<br>April 2010 |
|----------------------------------------------------------------------------|--------------------------------------|
| Archibald FS and Fridovich I. <i>J Bacteriol</i> 145: 442–451, 1981        | 172                                  |
| Archibald FS and Fridovich I. <i>J Bacteriol</i> 146: 928–936, 1981        | 152                                  |
| Martin JP and Fridovich I. <i>J Biol Chem</i> 256: 6080–6089, 1981         | 106                                  |
| Hassan HM and Fridovich I. <i>J Bacteriol</i> 141: 156–163, 1980           | 145                                  |
| Hassan HM and Fridovich I. <i>Arch Biochem Biophys</i> 196: 385–395, 1979  | 444                                  |
| Malinowski DP and Fridovich I. <i>Biochemistry</i> 18: 5909–5917, 1979     | 114                                  |
| Caliborne A and Fridovich I. <i>J Biol Chem</i> 254: 4245–4252, 1979       | 263                                  |
| Hassan HM and Fridovich I. <i>J Biol Chem</i> 254: 846–852, 1979           | 180                                  |
| McCord JM and Fridovich I. <i>Ann Intern Med</i> 89: 122–127, 1978         | 377                                  |
| Misra HP and Fridovich I. <i>Arch Biochem Biophys</i> 189: 317–322, 1978   | 124                                  |
| Britton L, et al. <i>J Bacteriol</i> 134: 229–236, 1978                    | 148                                  |
| Hassan HM and Fridovich I. <i>J Biol Chem</i> 253: 6445–6450, 1978         | 126                                  |
| Hassan HM and Fridovich I. <i>J Biol Chem</i> 253: 1838–1845, 1978         | 231                                  |
| Lynch RE and Fridovich I. <i>J Biol Chem</i> 253: 1838–1845, 1978          | 256                                  |
| Lynch RE and Fridovich I. <i>J Biol Chem</i> 253: 469704699, 1978          | 275                                  |
| Misra HP and Fridovich I. <i>Arch Biochem Biophys</i> 181: 308–312, 1977   | 191                                  |
| Hassan HM and Fridovich I. <i>J Bacteriol</i> 129: 1574–1583, 1977         | 187                                  |
| Hassan HM and Fridovich I. <i>J Biol Chem</i> 252: 7667–7672, 1977         | 364                                  |
| Kellogg EW and Fridovich I. <i>J Biol Chem</i> 252: 6721–6728, 1977        | 466                                  |
| Hodgson EK and Fridovich I. <i>Arch Biochem Biophys</i> 172: 202–205, 1976 | 100                                  |
| Misra HP and Fridovich I. <i>Arch Biochem Biophys</i> 176: 577–581, 1976   | 132                                  |
| Misra HP and Fridovich I. <i>Biochemistry</i> 15: 681–687, 1976            | 152                                  |
| Kellogg EW and Fridovich I. <i>J Gerontol</i> 31: 405–408, 1976            | 120                                  |
| Fridovich I. <i>Am Sci</i> 63: 54–59, 1975                                 | 100                                  |
| Hodgson EK and Fridovich I. <i>Biochemistry</i> 14: 5294–5299, 1975        | 618                                  |
| Hodgson EK and Fridovich I. <i>Biochemistry</i> 14: 5299–5303, 1975        | 195                                  |
| Kellogg EW and Fridovich I. <i>J Biol Chem</i> 250: 8812–8817, 1975        | 777                                  |
| Ravindranath SD and Fridovich I. <i>J Biol Chem</i> 250: 6107–6112, 1975   | 108                                  |
| Fridovich I. <i>Adv Enzymol Relat Areas Mol Biol</i> 41: 35–97, 1974       | 753                                  |
| Gregory EM and Fridovich I. <i>Anal Biochem</i> 58: 57–62, 1974            | 118                                  |
| Gregory EM, et al. <i>J Bacteriol</i> 117: 456–460, 1974                   | 139                                  |
| Forman HJ and Fridovich I. <i>Arch Biochem Biophys</i> 158: 396–400, 1973  | 129                                  |
| Beauchamp CO and Fridovich I. <i>Biochim Biophys Acta</i> 317: 50–64, 1973 | 252                                  |
| Forman HJ and Fridovich I. <i>J Biol Chem</i> 248: 2654–2649, 1973         | 215                                  |
| Gregory EM and Fridovich I. <i>J Bacteriol</i> 114: 543–548, 1973          | 305                                  |
| Gregory EM, et al. <i>J Bacteriol</i> 115: 987–991, 1973                   | 143                                  |
| Gregory EM and Fridovich I. <i>J Bacteriol</i> 114: 1193–1197, 1973        | 245                                  |
| Weisiger RA and Fridovich I. <i>J Biol Chem</i> 248: 3582–3592, 1973       | 689                                  |
| Weisiger RA and Fridovich I. <i>J Biol Chem</i> 248: 4793–4796, 1973       | 580                                  |
| Yost FJ and Fridovich I. <i>J Biol Chem</i> 248: 4905–4908, 1973           | 299                                  |
| Hodgson EK and Fridovich I. <i>Photochem Photobiol</i> 18: 451–455, 1973   | 102                                  |
| Misra HP and Fridovich I. <i>J Biol Chem</i> 247: 188–192, 1972            | 274                                  |
| Cohen HJ and Fridovich I. <i>J Biol Chem</i> 246: 359–366, 1971            | 214                                  |
| Keele, BB Jr., et al. <i>J Biol Chem</i> 246: 2875–2880, 1971              | 160                                  |
| Misra HP and Fridovich I. <i>J Biol Chem</i> 246: 6886–6890, 1971          | 145                                  |
| McCord JM, et al. <i>Proc Natl Acad Sci USA</i> 68: 1024–1027, 1971        | 694                                  |
| Beauchamp C and Fridovich I. <i>J Biol Chem</i> 245: 4641–4645, 1970       | 571                                  |
| Fridovich I. <i>J Biol Chem</i> 245: 4053–4057, 1970                       | 898                                  |
| Keele BB Jr., et al. <i>J Biol Chem</i> 245: 6176–6181, 1970               | 287                                  |
| McCord JM and Fridovich I. <i>J Biol Chem</i> 245: 1374–1377, 1970         | 204                                  |
| McCord JM and Fridovich I. <i>J Biol Chem</i> 244: 6056–6065, 1969         | 299                                  |
| McCord JM and Fridovich I. <i>J Biol Chem</i> 243: 5753–5760, 1968         | 894                                  |
| Fridovich I. <i>J Biol Chem</i> 238: 592–598, 1963                         | 127                                  |
| Fridovich I and Handler P. <i>J Biol Chem</i> 237: 916–921, 1962           | 175                                  |
| Rajagopalan KV, et al. <i>J Biol Chem</i> 237: 922–928, 1962               | 260                                  |
| Fridovich I and Handler P. <i>J Biol Chem</i> 236: 1836–1840, 1961         | 152                                  |
| Rajagopalan KV, et al. <i>J Biol Chem</i> 236: 1059–1065, 1961             | 105                                  |
